1

2

3 The genomic and epidemiological virulence patterns of *Salmonella*

4 *enterica* serovars

5

6 Gavin J. Fenske<sup>1</sup>, Jane G. Pouzou<sup>1</sup>, Régis Pouillot<sup>1</sup>, Daniel D. Taylor<sup>1</sup>, Solenne Costard<sup>1</sup>, and

7 Francisco J. Zagmutt<sup>1\*</sup>

8

9 <sup>1</sup>EpiX Analytics, Fort Collins, Colorado, United States of America

10

11 \*Corresponding Author

12 Email: [fzagmutt@epixanalytics.com](mailto:fzagmutt@epixanalytics.com)

13

14

15

16

## 17 **Abstract**

18           The serovars of *Salmonella enterica* display dramatic differences in pathogenesis and  
19 host preferences. Grouping *Salmonella* isolates and serovars by their public health risk can  
20 provide better *Salmonella* control targets along the food chain. We collated a curated set of  
21 12,337 *S. enterica* isolate genomes from human, beef, and bovine sources in the US. After  
22 annotating a virulence gene catalog for each isolate, we used unsupervised random forest  
23 methods to estimate the proximity (similarity) between isolates based upon the genomic  
24 presentation of putative virulence traits. We then grouped isolates (virulence clusters) using  
25 hierarchical clustering (Ward's method), used non-parametric bootstrapping to assess cluster  
26 stability, and externally validated the virulence clusters against epidemiological virulence  
27 measures from FoodNet, the National Outbreak Reporting System (NORS), and US federal  
28 sampling of beef products. We identified five stable virulence clusters of *S. enterica* serovars.  
29 Cluster 1 serovars yielded an annual incidence rate of domestically acquired sporadic cases  
30 roughly one and a half times higher than the other four clusters combined. Compared to other  
31 clusters, cluster 1 also had a higher proportion of infections leading to hospitalization and was  
32 implicated in more foodborne and beef-associated outbreaks, despite being isolated at a similar  
33 frequency from beef products as other clusters. We also identified subpopulations within 11  
34 serovars. Remarkably, we found *S. Infantis* and *S. Typhimurium* subpopulations that  
35 significantly differed in genome length and clinical case presentation. Further, we found that the  
36 presence of the pESI plasmid accounted for the genome length differences between the *S.*  
37 *Infantis* subpopulations. Our results demonstrate that *S. enterica* strains with the highest  
38 incidence of human infections share a common virulence repertoire. This work could be used in

39 combination with foodborne surveillance information to best target serovars of public health  
40 concern.

## 41 **Introduction**

42 Members of *Salmonella enterica* subspecies *enterica* are some of the most ubiquitous  
43 agents implicated in foodborne human illnesses. Despite being constituents of the same  
44 subspecies, members of *S. enterica* are not only commonly isolated from livestock but also  
45 amphibians [1] and wild birds [2]. The wide host range for *S. enterica* makes control of the  
46 pathogen exceedingly difficult due to the large number of potential reservoirs. Historically,  
47 strains of *S. enterica* have been grouped into units termed serovars based upon serological  
48 antigen presentation. While an initial list presented 44 *S. enterica* serovars in 1934 [3], today's  
49 descriptions include over 2,500 serovars of *S. enterica* [4]. Nonetheless, in the US only 20  
50 serovars accounted for 69.2% of human *S. enterica* isolates collected in 2016 by the US Centers  
51 for Disease Control and Prevention's (CDC) Laboratory-based Enteric Disease Surveillance  
52 (LEDS) program [5]. Furthermore, nearly 10% of *S. enterica*'s serovars may be polyphyletic or  
53 paraphyletic [6].

54 To establish infections in disparate hosts, *S. enterica* manipulates common immune  
55 functions of higher vertebrates. Indeed, the classic gastroenteritis associated with *S. enterica*  
56 infections is the result of the pathogen affecting the host's innate immune system to generate  
57 inflammation, subsequently producing unique metabolic niches for *S. enterica* while killing its  
58 competitors for reduced substrates in the hindgut [7-9]. Such remarkable expropriation of the  
59 hosts immune functions is achieved by virulence genes, many of which are contained within  
60 chromosomal elements termed Salmonella Pathogenicity Islands (SPI) [10]. Genes contained  
61 within SPI aid in host cell invasion, and subsequent survival and dissemination within and

62 between Eukaryotic host cells [11,12]. However, serovars display differences in pathogenesis  
63 and host-preferences. For example, the human-restricted serovar *S. enterica* ser. Typhi (*S.*  
64 Typhi), the etiological agent of typhoid fever, does not typically cause submucosal inflammation  
65 and resultant diarrhea in infected patients as with classical salmonellosis, but instead elicits a  
66 systemic enteric fever characterized by initial immune evasion [13,14]. *S. Dublin*, a bovine  
67 adapted serovar, commonly generates systemic infections in humans and is isolated from blood  
68 samples in 61% of human clinical infections as compared to an average of 5% for other *S.*  
69 *enterica* serovars in the US [15]. The general pathogenesis of *S. enterica* is not fully elucidated,  
70 and the virulence potential for individual serovars is poorly understood. Furthermore, most  
71 studies have focused upon *S. Typhimurium* as a model organism for all *S. enterica* virulence,  
72 [8,16-21] which could obfuscate differences between serovars.

73 Despite the tremendous virulence diversity within *S. enterica*, microbial criteria from the  
74 US Food Safety and Inspection Services (FSIS) on important sources of *S. enterica* such as beef  
75 and poultry meats target all serovars equally, based on prevalence. Further, traditional  
76 surveillance methods can take considerable time to identify emerging serovars of public health  
77 concern, thereby delaying food safety intervention implementation [22]. Understanding virulence  
78 differences between serovars and identifying emerging virulent serovars in a timely manner can  
79 be important for more focused risk management strategies targeting serovars with an inordinate  
80 impact on public health while reducing food waste due to recalls.

81 Previous studies have used genomics to identify serovar groups of public health concern.  
82 Karanth et al. analyzed a limited number of genomes and serovars originating from humans,  
83 poultry, and swine to characterize virulent serovars [23]. This analysis had the benefit of using  
84 the entire genome of *Salmonella* to group isolates by disease presentation; however, the

85 computational resources required prevent its application to a large number of isolates. In another  
86 study, researchers used single nucleotide polymorphism (SNP) clusters and *S. Saintpaul* as a  
87 model to identify virulent isolates [24]. Although using high-resolution genomic methods  
88 identified SNP clusters associated with a high proportion of human clinical isolates, *S. Saintpaul*  
89 may not be the best serovar model due to its polyphyletic nature [25]. The objective of this study  
90 was to develop a computationally efficient genomic approach to group *Salmonella* serovars by  
91 their risk to human health, using virulence biomarkers in isolates from humans, beef, and bovine  
92 animals. We chose beef as a model foodstuff since US federal monitoring of *Salmonella* in beef  
93 is well-established, nationally representative, and beef remains an important vehicle for *S.*  
94 *enterica*. Beef production in the US is more decentralized than poultry and pork production [26]  
95 and we e hypothesize that this decentralization may present unique genomic populations arising  
96 from geographic separation as previously observed in *S. enterica* serovars [27,28]. Furthermore,  
97 *S. enterica* in beef products is understudied compared to other vehicles such as eggs, poultry, and  
98 pork meat.

## 99 **Materials and methods**

100 We used genetic virulence factors as markers to group serovars by their risk to human  
101 health. After compiling a curated set of *S. enterica* genomes (n=12,337) from human, bovine,  
102 and beef sources, we applied an unsupervised random forest and hierarchical clustering approach  
103 to group isolates based upon genomic virulence trait presentation and validated the groups  
104 against epidemiological measures including clinical presentation from sequenced isolates  
105 collected by the FoodNet active surveillance network (29).

## 106 **Contig assembly selection and quality criteria**

107 We compiled *S. enterica* assemblies from bovine-associated isolates from three primary  
108 sources: 1. BioProject PRJNA242847 (FSIS HACCP samples, accessed 7/13/2021), 2.  
109 BioProject PRJNA292666 (FSIS NARMS isolates, accessed 7/13/2021), and 3. BioProject  
110 PRJNA292661 (FDA NARMS isolates, accessed 8/25/2021). We collected isolates from sources  
111 specified as bovine-associated or beef origin from the metadata for the above BioProjects.

112 We retrieved *S. enterica* isolates from human clinical cases from BioProject  
113 PRJNA230403 (CDC PulseNet, accessed 9/13/2021) and identified sporadic, domestically  
114 acquired *S. enterica* isolates from the FoodNet active surveillance network [29]. We did not  
115 include outbreak cases from FoodNet since they are not attributed to a particular source in that  
116 dataset. Instead, we used the National Outbreak Reporting System (NORS) dataset, a passive  
117 system for reporting enteric disease outbreaks in the US, to identify beef-attributed outbreak  
118 isolates. We initially defined beef attribution based on the Interagency Food Safety Analytics  
119 Collaboration (IFSAC) classification. As beef-associated salmonellosis outbreaks for which  
120 clinical isolates were sequenced are limited, we widened the definition of potentially beef-  
121 associated illness to include outbreaks which listed beef as an identified contaminated ingredient.  
122 We based this inclusion on whether the list of commodities and ingredients per outbreak  
123 included beef dishes, even if other possible ingredients could not be ruled out to definitively  
124 assign an IFSAC classification. The following text strings were used to identify beef-associated  
125 outbreaks: "beef", "burger", "steak", "carne", "kitfo", "ox tongue", "short-rib", "prime rib",  
126 "barbacoa". If the IFSAC classification attributed an outbreak to other foods, we did not  
127 designate it as a beef-associated outbreak.

128 We removed isolates from the data set if: 1) No pre-computed assembly was available on  
129 NCBI, 2) SKESA v. 2.2 was not used to construct the assembly, 3) The number of contigs  
130 representing the assembly was greater than 300, and 4) The contig n50 was less than 25,000 bp.  
131 After initial parsing for isolation sources and assembly quality, we included serovars with 50 or  
132 more isolates in the analysis. In total, the final analysis set includes 12,337 assemblies and  
133 represents 37 serovars.

### 134 **In silico serovar prediction**

135 We used *Salmonella in silico* Typing Resource (SISTR) [30] with default options to  
136 assign putative serovars to each assembly. 1,077 assemblies failed the quality control step within  
137 the SISTR software with the same error message “FAIL: Wzx/Wzy genes missing...”, but all  
138 330 / 330 genes for the core genome multilocus sequence typing (cgMLST) scheme used within  
139 the software were present within these assemblies. We retained assemblies failing QC with the  
140 aforementioned error message and because they contained all 330 cgMLST loci for the analysis.  
141 S1 table provides full details of the SISTR serotyping results. We excluded from the analysis any  
142 assemblies which failed the quality control step and did not have all 330 cgMLST genes.

### 143 **Virulence gene annotation**

144 We collated a custom database of putative virulence factors from *Salmonella*,  
145 *Escherichia*, *Shigella*, and *Yersinia* from the virulence factor database (VFDB) (accessed  
146 9/13/2021) [31] and putative virulence factors from *Salmonella*, *Escherichia*, and *Shigella* from  
147 PATRIC (accessed 9/13/2021) [32]. Next, we combined amino acid sequences of the open  
148 reading frames (ORF) with a reference proteome of *Salmonella* Typhimurium LT2  
149 (<https://www.uniprot.org/proteomes/UP000001014>) and made the database non-redundant by  
150 clustering the open reading frames at 0.90 global identity using cd-hit [33]. We passed the

151 resultant database to Prokka [34] using the “--proteins” option to specify the database as the  
152 primary annotation database in the software pipeline. We then parsed gene annotations from the  
153 VFDB and PATRIC non-redundant database from the resultant Prokka annotation tables.  
154 Additionally, to ensure consistent ORF predictions between assemblies, we trained a model  
155 using Prodigal [35] on the chromosome of the reference Salmonella Typhimurium LT2 assembly  
156 ASM694v2 ([https://www.ncbi.nlm.nih.gov/assembly/GCF\\_000006945.2/](https://www.ncbi.nlm.nih.gov/assembly/GCF_000006945.2/)) and passed the  
157 training file to Prokka using the command “--prodigaltf”.

## 158 **pESI plasmid identification**

159 The pESI plasmid is an emerging concern in some *S. enterica* serovars, namely *S.*  
160 *Infantis* [36]. To confirm the presence of this plasmid, we compiled an additional nucleotide  
161 database of 13 marker genes previously used to identify pESI plasmids in *S. enterica* contig  
162 assemblies from two sources [36,37]. We then conducted a nucleotide BLAST search against the  
163 database using the software Abricate [38] and defined positive hits as a percent identify of  $\geq 95\%$   
164 and percent coverage of  $\geq 95\%$ . We presumed that an isolate contained the pESI plasmid if the  
165 contig assembly was positive for the pESI specific *repA* gene and contained at least five  
166 additional marker genes.

## 167 **Random forest model construction**

168 We used virulence gene annotations from the resultant Prokka outputs and constructed a  
169 count matrix of virulence genes. We excluded putative virulence loci with a prevalence of  
170 greater than 0.95 or which were not present in at least 10 (0.0008) assemblies. To generate row  
171 similarity (isolate relatedness), we fit an unsupervised random forest to the count matrix of  
172 virulence loci (assemblies x virulence factors) using the randomForest [39] package in R[40].



173 The random forest model contained 50,000 trees and used 60 features (columns, virulence loci)  
174 at every split.

## 175 **Grouping isolates and assessing cluster stability**

176 We converted the row-wise proximity matrix from the random forest model to a distance  
177 matrix (1 – similarity) and subjected it to agglomerative clustering using Ward’s method [41].  
178 We conducted two analyses: 1)  $k = 5$ , used to group serovars by virulence and 2)  $k = 37$ , using  
179 the same number of clusters as serotypes in the data to identify possible subpopulations within  
180 serovars with different virulence gene catalogues. We defined cluster stability for both analyses  
181 as a Jaccard similarity of  $\geq 0.75$  [42] for 10,000 non-parametric bootstrap samples. For the main  
182 serovar clustering analysis, we choose  $k=5$  as it was the highest value for which all clusters were  
183 stable. The  $k=37$  version of the analysis tested whether distribution of virulence factor  
184 combinations is more similar within each serotype than between serotypes and, therefore,  
185 whether serotype is a reasonable representation of these virulence differences. We defined  
186 serovar subpopulations as serovars with at least two of these populations annotated into different  
187 clusters ( $k = 37$  clustering) and with at least two of the populations representing greater than or  
188 equal to 0.20 of the total serovar population. Clustering and bootstrapping were performed using  
189 the clusterboot function from the fpc [43] package in R.

## 190 **Epidemiological indicators**

191 We estimated epidemiological indicators for both virulence clusters and serovars using  
192 sporadic and domestically acquired cases from 2016 – 2019. We excluded outbreak-associated  
193 cases to decrease bias due to outbreak size and removed travel-related cases to exclude  
194 foodstuffs from regions that may have different *S. enterica* population structures than the US and  
195 are not good indicators of US consumer exposure to *S. enterica* in food. We calculated the

196 proportion of positive samples for *Salmonella*, individual serovars, and each cluster in beef  
 197 products from FSIS regulatory testing programs: MT43 (raw ground beef), MT60  
 198 (manufacturing trimmings) and MT64 (Components other than Trim) for 2016 – 2019. We  
 199 modeled all proportions using  $Beta(s+0.5, n-s+0.5)$  (eqn. 1), with a Jeffery’s prior ( $Beta(0.5, 0.5)$ )  
 200 as a Bayesian conjugate to the Binomial distribution[44]. Table 1 lists parameters  $s$  and  $n$  used to  
 201 model these proportions. We used 1M Monte Carlo simulations to estimate and compare  
 202 posterior distributions using numerical integration, with a 99% confidence level for statistical  
 203 significance.

204

205 **Table 1. Description of parameters used for calculation of epidemiological indicator**  
 206 **estimations using Equation 1**

| Model variable / Epidemiological indicator                                | Parameter description                                                                                          |                                                                                |
|---------------------------------------------------------------------------|----------------------------------------------------------------------------------------------------------------|--------------------------------------------------------------------------------|
|                                                                           | $s$ (numerator)                                                                                                | $n$ (denominator)                                                              |
| Salmonella proportion positive in beef ( $p_+$ )                          | $(s_+)$ : number of FSIS samples positive for Salmonella                                                       | $(n_+)$ : number of FSIS samples taken                                         |
| Hospitalization proportion                                                | $H_k$ : number of hospitalizations from cluster $k$ ( $k=1\dots5$ )                                            | $I_k$ : number of total infections in FoodNet from cluster $k$ ( $k=1\dots5$ ) |
| Extraintestinal Infection proportion                                      | $EI_k$ : number of extraintestinal infection from cluster $k$ ( $k=1\dots5$ )                                  |                                                                                |
| Mortality Proportion                                                      | $M_k$ : number of deaths from cluster $k$ ( $k=1\dots5$ )                                                      |                                                                                |
| Proportion of gene presence within respective cluster group ( $p_{g,k}$ ) | $n_{k,g}$ : number of isolates from cluster ( $k$ =Cluster 1 vs. clusters 2-5) with gene $g$ ( $g=1\dots182$ ) | $n_k$ number of isolates from cluster $k$ ( $k$ =Cluster 1 vs. clusters 2-5)   |

207

## 208 Incidence of domestically acquired sporadic cases

209 We modeled the incidence of domestically acquired sporadic cases per 100k people per  
 210 year ( $\lambda_{ij}$ ) for serovar  $j$  in FoodNet state  $i$  using the Bayesian conjugate for a Poisson rate with  
 211 Jeffrey’s prior  $Gamma(0.5, 0.00001)$ (44), hence  $Gamma(\alpha_i + 0.5, \beta_i t + 0.00001)$ (eqn. 2),  
 212 where  $\alpha_{ij}$  is the serovar case totals per state and  $\beta_i$  is the FoodNet catchment area population for  
 213  $t=4$  years. Sporadic cases are defined as illnesses which were not linked to a known outbreak.

214 The catchment area of FoodNet is not evenly distributed between the 10 participating states, so  
215 the population-weighted mean serovar incidence ( $\lambda_j$ ) for the study period was  $\sum_{i=1}^{10} \lambda_{ij} p_i$ , where  
216  $\lambda_{ij}$  is the FoodNet state-specific mean serovar incidence and  $p_i$  is the state catchment proportion  
217 of total FoodNet population. Virulence cluster population-weighted average incidence,  $\lambda_k$ , is the  
218 sum of the clusters' constituent serovars incidence rates for the study period ( $\lambda_k = \sum_{j=1}^{j_k} \lambda_j$ ).

### 219 **Serovar proportion positive in beef**

220 We determined the proportion of *Salmonella* positives ( $p_+$ ) following eqn. 1, with  $s_+$   
221 number of samples positive for *Salmonella* and  $n_+$  total number of samples from FSIS testing.  
222 We estimated the proportion of serovar  $j$  isolated from beef products ( $X_j$ ) with a Dirichlet  
223 distribution, ( $Dir(a_j)$  eqn. 3), where  $a_j$  is the number of FSIS isolates from serovar  $j$ . We excluded  
224 serovars without any positive isolates in FSIS testing and retained all serovars from the testing  
225 program (including those not included in the analysis set).

226 Serovar proportion positive ( $p_{j+}$ ) was taken as the product of total *Salmonella* proportion  
227 positive ( $p_+$ ) and the serovar proportion of the total *Salmonella* population from eqn. 3 ( $X_j$ ).  
228 Finally, we derived the cluster proportion positive ( $p_{k+}$ ) as the summation of the cluster's  
229 constituent serovars.

### 230 **Hospitalization, Extraintestinal Infection, and Mortality Proportions**

231 We determined the proportion of infections with a certain outcome (i.e., hospitalization,  
232 extraintestinal infections, and mortality) for each cluster  $k$  ( $k=1\dots5$ ) and for cluster 1 vs the  
233 combinations of others. We defined extraintestinal infections as having "URINE", "BLOOD",  
234 "ORTHO", "ABSCESS", "OTHER STERILE SITE" and "CSF" isolation sources. We modeled  
235 all the proportions using eqn. 1, with parameters described in Table 1.

## 236 **Differential gene carriage**

237 To identify genes differential between cluster 1 and combined clusters 2-5, we trained a  
238 supervised random forest model (ntree = 5,000, features to try at split = 13) to classify isolates  
239 into two groups: cluster 1 and clusters 2-5. We extracted variable importance from the random  
240 forest model and defined gene importance using the mean decrease of Gini impurity. As with  
241 other proportions, we used eqn. 1 to model the proportion of gene presence ( $p_{g,k}$ ) within  
242 respective cluster group (1 vs. 2-5) for each of the virulence genes used in the random forest. The  
243 relative frequency (RF) of a given gene was the resultant ratio of proportions of gene presence  
244 ( $RF = p_{g_1} / p_{g_{(2-5)}}$ ).

## 245 **Code and data availability**

246 Aggregated data and code written for this analysis are available in our online repository:  
247 link will be provided upon publication (private links shared with editor and reviewer). FoodNet  
248 data is used with permission from the Centers for Disease Control and Prevention and although  
249 raw data may not be shared, code written from aggregated inputs is provided in our online  
250 repository.

## 251 **Results**

### 252 **Genome assemblies analyzed**

253 The Pathogen Detection Network hosted by NCBI contains over 400,000 sequenced  
254 *Salmonella* isolates from various sources and contributors. From these, we extracted 53,849  
255 isolates from specific sampling programs, further reduced to a final analysis set to establish an  
256 analysis set of 12,337 *S. enterica* assemblies of human clinical cases in the US and bovine and

257 beef associated isolates, representing 37 major serovars (Fig 1). Approximately 55% (6,751)  
258 assemblies are from US human clinical infections with the remaining 45% (5,586) representing  
259 isolates from bovine animals and beef products. The metadata for the genomes analyzed is  
260 provided in S2 Table.

261 **Fig 1. Analysis set of genomes.** Description of the *S. enterica* genome assemblies considered,  
262 and exclusion and inclusion criteria applied to generate the analysis set.

### 263 **Clustering serovars using isolate virulence gene catalogues**

264 To establish clusters of serovars, we identified virulence genes from each assembly and  
265 compiled them into a count matrix, trained an unsupervised random forest model to approximate  
266 similarity between isolate virulence gene catalogues (Fig 2), and subjected the resultant isolate  
267 similarity matrix to agglomerative clustering to identify clusters with subsequent non-parametric  
268 bootstrapping to validate cluster stability.

269 We identified five stable clusters of *S. enterica* isolates (Fig 3A), with the majority of  
270 serovar isolates resident within the same clusters (mean within serovar cluster proportion =  
271 0.96). (Fig 3B). However, *S. Reading* (cluster 1: n = 28 (0.47), cluster 3: n = 32 (0.53)), *S.*  
272 *Saintpaul* (cluster 3: n = 134 (0.66), cluster 1: n = 68 (0.34)), and *S. I 1,4,[5],12:b:-* (cluster 1: n =  
273 53 (0.66), cluster 3: n = 30 (0.34)) had at least 33% of total serovar isolates in two different  
274 virulence clusters. The five virulence clusters are of uneven size (Fig 3C) with cluster 1  
275 containing almost 10 times more assemblies than cluster 2. We attempted to decrease the size of  
276 cluster 1 by introducing a sixth cluster. However, the sixth cluster was unstable (bootstrap  
277 Jaccard similarity = 0.515) and cluster 4 was split, not cluster 1, indicating that the variance  
278 (Ward's method used to cluster) within cluster 1 is less than that of cluster 4 despite its much  
279 larger size (S1 Fig). Interestingly, cluster 2 is comprised of only *S. Javiana* and the cluster

280 homogeneity of *S. Javiana* was preserved with the addition of the sixth cluster (S1 Fig). Assembly  
281 cluster designations are provided in Table S3.

282 **Fig 2. Conceptual model of virulence cluster development.** First, we downloaded contig  
283 assemblies and quality controlled for fragmentation followed by the identification of virulence  
284 genes. We then fit an unsupervised random forest model to the isolate level virulence gene  
285 catalogues to approximate relatedness. We converted the resultant similarity matrix to a distance  
286 matrix (1 – similarity) and clustered using Ward’s method. We identified five stable clusters and  
287 validated using non-parametric bootstrapping.

288 **Fig 3. Description of the five virulence clusters.** (A) Dendrogram depicting the hierarchical  
289 relationship between 12,337 *S. enterica* genome assemblies based upon virulence gene carriage  
290 with the five virulence clusters superimposed on top. (B) Heatmap of serovar proportion within  
291 each of the five respective virulence clusters. Rows are clustered using Ward’s method. (C)  
292 Characteristics of the five virulence clusters: cluster stability - Jaccard similarity of 10,000 non-  
293 parametric bootstraps, Number of Genomes - depicting the number of *S. enterica* genomes  
294 constituent in each cluster, and number of serovars (within cluster serovar proportion > 0.5) in  
295 each cluster.

## 296 **General epidemiological characteristics of virulence clusters**

297 To investigate if the genomic virulence clusters correspond to clinical case presentation,  
298 we computed basic epidemiological characteristics per cluster for 2016-2019 as proxies for  
299 virulence phenotypes: proportion positive in beef products, number of outbreaks, incidence of  
300 domestically acquired sporadic cases per 100k people per year, hospitalization proportion given  
301 infection, extraintestinal infection proportion given infection, and mortality proportion given  
302 infection. We computed the results by virulence cluster (S4 Table) and by serovar (S5 Table).

303 Not every *S. enterica* captured during surveillance programs in the US is subjected to  
304 sequencing, therefore we attributed cases from a given serovar to the cluster to which the highest  
305 proportion of serovar isolate was assigned (e.g., 98.5% of *S. Typhimurium* isolates were resident  
306 in cluster 1, therefore all cases of *S. Typhimurium* in the datasets were allocated to cluster 1).  
307 Cluster 1 serovars have the highest incidence rate of domestically-acquired sporadic cases (5.9  
308 cases per 100k population per year, 99% CrI: 5.77 – 6.06) (Fig 4A), approximately 1.5x higher  
309 than that of clusters 2-5 combined during 2016 – 2019 (incidence rate ratio: 1.5, 99% CrI: 1.44 –  
310 1.55). Moreover, infections from serovars in cluster 1 had a higher proportion of hospitalizations  
311 than serovars in cluster 2 (relative frequency (RF): 1.10, 99% CrI: 1.002 – 1.200), cluster 4 (RF:  
312 1.15, 99% CrI: 1.029 – 1.296), and cluster 5 (RF: 1.17, 99% CrI: 1.058 – 1.288) (Fig 4B). The  
313 cluster 1 proportion positive in beef products was less than half of clusters 3-5 (proportion  
314 positive ratio: 0.44, 99% CrI: 0.366 – 0.528) (Fig 4C). However, cluster 1 serovars were  
315 implicated in the highest proportion of total foodborne outbreaks and beef associated outbreaks  
316 in the US from 2016 – 2019 (Fig 4D), generating approximately 2.5x more beef associated  
317 outbreaks (20 vs. 8) than clusters 3-5 combined (There were no cluster 2 isolates found in beef  
318 sampling or in beef associated outbreaks). Additionally, cluster 1 serovars were involved in  
319 approximately 1.47x more foodborne outbreaks than clusters 2-5 combined from 2016 - 2019  
320 (285 vs. 194).

321

322 **Fig 4. Epidemiological indicators of the five virulence clusters for the study period 2016-**  
323 **2019.** (A) Incidence of domestically acquired sporadic cases per 100k population per year by  
324 virulence cluster. (B) Proportion of clinical infections resulting in hospitalization by virulence  
325 cluster. (C) Proportion positive estimates in FSIS testing of US beef products. No isolates from

326 cluster 2 (comprised solely of *S. Javiana*) were retrieved from 2016 – 2019. (D) Proportion of  
327 total US foodborne and beef-associated outbreaks attributed to serovars in the analysis set.

328

## 329 **Differential Carriage of Virulence Loci Between Cluster 1 and** 330 **Clusters 2-5**

331 Cluster 1 serovars yielded the largest number of foodborne outbreaks and the highest  
332 incidence rate of domestically acquired sporadic cases. Additionally, a clear bifurcation exists  
333 between cluster 1 and clusters 2-5 (Fig 3A). Therefore, we sought to identify virulence genes  
334 differentially present between clusters 1 and clusters 2-5. We estimated the proportion of gene  
335 presence for the top 20 most differential genes, as determined by Gini impurity, in cluster 1 and  
336 clusters 2-5 combined and derived their RF (Table 2). The top two genes (*f17d-D*, and *f17d-C*)  
337 which best differentiated cluster 1 from the others (highest mean decrease of Gini impurity) were  
338 found in much lower proportion in cluster 1 (*f17d-D*, RF: 0.07, 99% CrI: 0.057 – 0.075)(*f17d-C*,  
339 RF: 0.043, 99% CrI: 0.036 – 0.051) (Table 2). The full list of RF for each virulence gene tested,  
340 mean decrease of Gini impurity, and gene metadata are provided in S6 Table.

341

342 **Table 2. Importance and relative frequency of select virulence loci between cluster 1 and**  
343 **clusters 2-5.**

| Gene          | Mean Decrease<br>Gini Impurity | Relative Frequency<br>(Cluster 1 / Clusters 2-5) | Lower<br>Bound<br>(0.005) | Upper<br>Bound<br>(0.995) |
|---------------|--------------------------------|--------------------------------------------------|---------------------------|---------------------------|
| <i>f17d-D</i> | 504.64                         | 0.0657                                           | 0.05743                   | 0.07459                   |
| <i>f17d-C</i> | 455.07                         | 0.0432                                           | 0.03618                   | 0.05085                   |
| <i>rfbI</i>   | 405.35                         | 4.3706                                           | 4.12059                   | 4.64112                   |
| <i>rfbG</i>   | 394.86                         | 4.3704                                           | 4.12070                   | 4.64015                   |
| <i>rfbH</i>   | 336.41                         | 4.3579                                           | 4.10740                   | 4.62863                   |
| <i>csaB</i>   | 279.77                         | 0.0013                                           | 0.00032                   | 0.00323                   |



|                  |        |         |          |          |
|------------------|--------|---------|----------|----------|
| <i>cfaA</i>      | 266.06 | 0.0011  | 0.00021  | 0.00285  |
| <i>lpfE</i>      | 211.35 | 3.1146  | 2.97288  | 3.26624  |
| <i>faeD</i>      | 209.61 | 0.0004  | 0.00001  | 0.00162  |
| <i>csbC</i>      | 207.19 | 0.0033  | 0.00145  | 0.00608  |
| <i>lpfD</i>      | 205.67 | 3.1131  | 2.97157  | 3.26366  |
| <i>faeE</i>      | 204.28 | 0.0004  | 0.00001  | 0.00166  |
| <i>sseI/srfH</i> | 202.37 | 12.5251 | 11.06216 | 14.21786 |
| <i>lpfA</i>      | 179.38 | 3.1130  | 2.97120  | 3.26442  |
| <i>lpfC</i>      | 173.75 | 3.0919  | 2.95155  | 3.24155  |
| <i>lpfB</i>      | 161.87 | 3.0812  | 2.94158  | 3.22994  |
| <i>rfbC</i>      | 140.29 | 2.7218  | 2.60974  | 2.84109  |
| <i>faeC</i>      | 112.30 | 0.0004  | 0.00001  | 0.00186  |
| <i>rfbD</i>      | 109.33 | 2.3555  | 2.26954  | 2.44697  |
| <i>rfbP</i>      | 104.21 | 2.3741  | 2.28674  | 2.46708  |

344

345 Table 2 legend. The top 20 most differential virulence genes between cluster 1 and clusters 2-5  
346 as identified by a supervised random forest model. Genes are arranged in descending order of  
347 mean decrease of Gini impurity. RF of gene carriage is the proportion of gene presence in for  
348 cluster 1 divided by that in clusters 2-5 combined.

## 349 **Within serovar virulence subpopulations**

350 Horizontal gene transfer molds virulence gene carriage, especially within SPI [45,46].  
351 We hypothesized that horizontal gene transfer may lead to virulence subpopulations that could  
352 be identified using random forest methods otherwise missed in more traditional alignment-based  
353 phylogeny methods. To test this hypothesis, we increased the number of clusters to correspond to  
354 the number of serovars ( $k = 37$ ). If no virulence subpopulations are present (within serovar  
355 variance is less than between serovar variance), each of the 37 clusters should contain a majority  
356 of one serovar (see methods). However, we found 11 serovars with virulence subpopulations  
357 (Table 3). The full list of subpopulation designations is provided in S7 Table. To test if virulence  
358 subpopulations may correspond to phenotypic differences in case presentation, we computed the  
359 proportion of clinical infections resulting in extraintestinal infections for each serovar

360 subpopulation for sequenced strains with case presentation in the FoodNet surveillance system.  
361 Two serovars yielded significant differences in invasiveness between serovar subpopulations. *S.*  
362 *Infantis* split into two subpopulations (subpopulation 18: n = 145, subpopulation 20: n = 243) as  
363 shown in Fig 5A. The genome assembly size for subpopulation 18 isolates was significantly  
364 longer (4.98 Mb vs. 4.68 Mb, p-value < 2.2E-16, Mann-Whitney U test) (Fig 5B) than isolates  
365 from subpopulation 20. Of the 388 *S. Infantis* genome assemblies in the analysis set, 242 had  
366 associated clinical presentation data from FoodNet split evenly between the two subpopulations  
367 (n = 121, n = 121). Isolates from subpopulation 18 were more than twice as likely to result in  
368 extraintestinal clinical infections than isolates from subpopulation 20 (RF: 2.06, 99% CrI: 1.122  
369 – 3.778) (Fig 5C). There was an association between subpopulation 18 isolates and older patients  
370 (median age 56.1 years) when compared to subpopulation 20 isolates (median age 36.4 years) (p-  
371 value: 5.00E-6, Mann-Whitney U test) (Fig 5D).

372 We hypothesized that the approximately 300kb difference between the assembly lengths  
373 of the *S. Infantis* subpopulations may be due to the presence of the pESI plasmid previously  
374 identified in *S. Infantis*(36). After checking all isolates for the presence of this plasmid, 144 out of  
375 145 *S. Infantis* isolates annotated to subpopulation 18 and 0 out of 243 isolates from  
376 subpopulation 20 were putatively positive for pESI plasmids. Only one isolate, a *S. Muenchen*,  
377 was putatively positive for the pESI plasmid outside of the *S. Infantis* 18 subpopulation.

378 Two subpopulations represented approximately 85% of the total *S. Typhimurium*  
379 population in the analysis set, which we analyzed further (Fig 6A). Similar to the *S. Infantis*  
380 subpopulations, the two subpopulations yielded significantly different genome assembly lengths  
381 (subpopulation 2: 4.90 Mb, subpopulation 18: 4.85 Mb, p-value < 2.2E-16, Mann-Whitney U  
382 test) (Fig 6B). However, the assembly difference of approximately 5kb between the *S.*

383 Typhimurium subpopulations is far less dramatic than the approximately 300kb difference  
384 observed between *S. Infantis* subpopulations. 668 of the 937 *S. Typhimurium* isolates in  
385 subpopulations 2 (n = 359) and 16 (n = 309) have clinical case presentation data. Subpopulation  
386 2 isolates presented as double the extraintestinal infections than subpopulation 16 isolates (RF  
387 2.11, 99% CrI: 1.109 – 4.016) (Fig 6C). In contrast with the *S. Infantis* subpopulations, the age of  
388 patients was not significantly different between the two subpopulations (p-value 0.97, Mann-  
389 Whitney U test) (Fig 6D).

390

391 **Fig 5. Description of two *S. Infantis* virulence subpopulations.** (A) Dendrogram highlighting  
392 the locations of the two *S. Infantis* virulence subpopulations within the greater population of  
393 12,337 *S. enterica* isolates. (B) Histograms of the assembly lengths for the respective  
394 subpopulations. (C) Proportion of extraintestinal infections among illnesses caused by the two  
395 subpopulations (FoodNet data). (D) Boxplots of the distribution of patient age in infections  
396 caused by the two subpopulations (FoodNet data).

397 **Fig 6. Description of two *S. Typhimurium* virulence subpopulations.** (A) Dendrogram  
398 highlighting the locations of the two *S. Typhimurium* virulence subpopulations within the greater  
399 population of 12,337 *S. enterica* isolates. (B) Histograms of the assembly lengths for the  
400 respective subpopulations. (C) Proportion of extraintestinal infections among illnesses caused by  
401 the two subpopulations (FoodNet data). (D) Boxplots of the distribution of patient age in  
402 infections caused by the two subpopulations (FoodNet data).

403

404 **Table 3. Within serovar virulence subpopulations.**

|  | Subpopulation A | Subpopulation B |
|--|-----------------|-----------------|
|--|-----------------|-----------------|

| Serovar          | Total Serovar Count | Subpopulation ID | Genome Count | Proportion of Total Serovar Population | Subpopulation ID | Genome Count | Proportion of Total Serovar Population |
|------------------|---------------------|------------------|--------------|----------------------------------------|------------------|--------------|----------------------------------------|
| I 1,4,[5],12:b:- | 83                  | 30               | 30           | 0.36                                   | 29               | 52           | 0.63                                   |
| I 1,4,[5],12:i:- | 530                 | 9                | 294          | 0.55                                   | 2                | 163          | 0.31                                   |
| Infantis         | 388                 | 20               | 243          | 0.63                                   | 18               | 145          | 0.37                                   |
| Kentucky         | 169                 | 32               | 89           | 0.53                                   | 21               | 80           | 0.47                                   |
| Montevideo       | 1341                | 14               | 503          | 0.38                                   | 11               | 838          | 0.62                                   |
| Muenchen         | 392                 | 12               | 133          | 0.34                                   | 6                | 195          | 0.50                                   |
| Newport          | 1751                | 6                | 427          | 0.24                                   | 1                | 926          | 0.53                                   |
| Oranienburg      | 137                 | 14               | 32           | 0.23                                   | 11               | 103          | 0.75                                   |
| Reading          | 60                  | 37               | 28           | 0.47                                   | 29               | 28           | 0.47                                   |
| Saintpaul        | 202                 | 29               | 53           | 0.26                                   | 27               | 134          | 0.66                                   |
| Typhimurium      | 1106                | 16               | 477          | 0.43                                   | 2                | 460          | 0.42                                   |

405

406 Table 3 legend: Serovars found to contain at least two subpopulations, each representing greater  
407 than 0.20 of the total serovar population. Subpopulations were identified by increasing the  
408 number of clusters to match the number of serovars ( $k = 37$ ). Provided is the subpopulation ID's,  
409 the number of genomes resident within each subcluster, and the proportion of the total  
410 population the subcluster represents. Note, that the subpopulations may not represent the total  
411 combined population of the serovar in the analysis set.

412

## 413 Discussion

414 The pathogenesis of *S. enterica* is not completely understood. Furthermore, how different  
415 serovars generate distinct disease pathologies is not well-defined either. To better understand  
416 how serovars group together based on virulence gene carriage, we used an unsupervised random  
417 forest, which allowed for rapid identification of serovars of public health concern. Compared to

418 methods used in previous studies [23,24], this scalable genomic approach allowed us to generate  
419 a measure of relatedness for a large number of *S. enterica* isolates in a computationally efficient  
420 manner and group them using established hierarchical clustering methods [41]. While we  
421 considered other clustering methods such as logistic principal component analysis and k-means  
422 clustering, we chose the unsupervised random forest approach because it is more robust to  
423 outliers, non-parametric, and aggregates results from many models rather than basing inference  
424 on a single, “best” model. Our method cannot be read as a traditional phylogeny of evolutionary  
425 process but rather as a snapshot of the current virulence potential of more than 12,000 isolates  
426 retrieved from humans, bovine animals, and beef products. We did not employ a traditional  
427 phylogeny as such classical alignment methods (core genome alignment, read mapping to a  
428 reference assembly, etc.) are computationally intensive given the number of samples we  
429 analyzed. Additionally, for this analysis, we were less interested in the evolutionary development  
430 of virulence, but rather in the current state of potential virulence that consumers are exposed to  
431 through beef products.

432 We contend that this method is pertinent to virulence loci found with SPI as the regions  
433 are subject to horizontal gene transfer [45,46]. Common methods to differentiate serovars  
434 typically rely on the alignment of core genes or single nucleotide polymorphisms (SNP)  
435 identified against reference assemblies [6,24,47,48]. These methods must rely on *post hoc*  
436 analysis to determine if two evolutionary similar strains have acquired virulence genes which  
437 may correspond to differences in case presentation as witnessed in *S. Infantis* and *S.*  
438 *Typhimurium*. Demarcating isolates by the presence/absence of virulence genes identified a  
439 cluster of serovars (cluster 1) that accounts for a large proportion of sporadic cases and beef-  
440 associated and total foodborne outbreaks compared to the other clusters combined. The higher

441 occurrence of beef-associated outbreaks occurs despite a much lower frequency of isolation from  
442 regulatory beef samples relative to serovars from the other clusters combined. Our method, in  
443 combination with quantitative risk assessment techniques could be used to account for the  
444 relative exposure to serovars (e.g., via different food consumption) and the resultant probability  
445 of disease.

446 FoodNet isolates are the basis of the incidence calculation, and the dataset does not  
447 provide source attribution. Therefore, it is probable that serovars from the sporadic human  
448 clinical data set are from multiple exposure sources (poultry, beef, vegetables, etc.). However,  
449 even with the expected wide source range of *S. enterica* isolates, most serovars resided in one of  
450 the five major virulence clusters (including beef and bovine isolates) suggesting that basal  
451 virulence gene carriage is conserved within serovars across sources.

452 Cluster 1 serovars generate more human infections than serovars in the other clusters.  
453 Our supervised random forest model identified virulence genes involved in attachment to host  
454 cells or outer membrane structure as the most differential genes between cluster 1 and 2-5 (as  
455 measured by mean decrease Gini impurity). The F17 fimbriae genes *f17-C* and *f17-D*, coli  
456 surface antigen operon (*csa*) and the *fae* fimbria operon were absent from cluster 1. All three  
457 operons originated from *Escherichia* virulence databases. Use of only putative *Salmonella*  
458 virulence factors from PATRIC [32] and the Virulence Factor Database [31] would not have  
459 annotated the open reading frames highlighting the need for expanding the putative virulence  
460 factors of *S. enterica* outside of the genera to members of Enterobacteriaceae. However, we  
461 found two operons, *lpf* (long polar fimbriae) and *rfb*, in significantly higher proportions in cluster  
462 1 than clusters 2-5. The higher proportion of *lpf* genes is notable as the operon has been  
463 associated with *S. enterica* binding the Peyer's patches, namely the M-cells found within the

464 lymphoid organs. [49,50]. This may potentiate the higher infectivity of cluster 1 serovars as  
465 recent work with the Type Three Secretion systems (T3SS) of *S. enterica* (involved with the  
466 introduction of effector proteins to the cytoplasm of host cells) suggest that the structure does not  
467 penetrate the cytoplasmic membrane like a syringe, but requires tension and adopts a “tent-pole”  
468 like structure [51]. If tension is required for the function of the T3SS, enhanced binding to M-  
469 cells mediated by the *lpf* operon may be one reason cluster 1 has a higher incidence rate of  
470 domestically acquired sporadic cases. The *lpf* operon has not only been implicated in *S. enterica*  
471 infections; strains of *Escherichia coli* O157:H7 with mutations in the *lpf* operon show decreased  
472 attachment and colonization in both in vitro [52] and in vivo [53] models again show the  
473 interplay of virulence mechanisms between Enterobacteriaceae. The roles of *rfb* genes are not as  
474 well investigated as the *lpf* operon but appear to be involved in the biosynthesis of the O-antigen  
475 and lipopolysaccharide structuring. A recent report suggests that the full complement of *rfb*  
476 genes leads to higher virulence in experimentally infected chickens [54].

477         Examining virulence gene catalogues not only identified large, serovar level clusters but  
478 also, by altering the cluster number (k value), virulence subpopulations within serovars. With the  
479 current method, it cannot be ascertained whether the virulence subpopulations represent  
480 polyphyletic clades within serovars as it cannot be interpreted as a phylogeny. However, by  
481 applying a top-down approach, the presence of increased virulence capacity can be readily  
482 identified. The two subpopulations of *S. Infantis* present over a two-fold difference in probability  
483 of extraintestinal infections. *S. Infantis* has been rapidly increasing in incidence in Israel and  
484 previous studies suggest that the addition of a virulence megaplasmid pESI could be responsible  
485 [55]. The mean difference between the two subpopulations was approximately 300kb, similar in  
486 length to the pESI plasmid (280 kb), and querying *S. Infantis* isolates against a database of

487 marker genes revealed that isolates in the subpopulation with longer assemblies are putatively  
488 positive for pESI presence. In addition, the pESI plasmid carries genes necessary for the  
489 synthesis of yersiniabactin [55], a siderophore dependent iron uptake system commonly observed  
490 in *Yersinia pestis*. The eight genes comprising the *ybt* operon are resident in every strain of the  
491 higher invasive cluster of *S. Infantis*, and only two out of 243 isolates from the lower invasive  
492 cluster contain the operon. Iron is an essential nutrient for *S. enterica* replication during systemic  
493 infections [56]. A previous study suggests that co-infections of Malaria and *S. enterica* leads to  
494 more systemic infections as excess iron is released upon the lysis of red blood cells, liberating  
495 the metal for use by *S. enterica* [57]. Increased iron availability, due to the addition of  
496 yersiniabactin, may be one factor for the almost double rate of extraintestinal infections of *S.*  
497 *Infantis* cluster 18 compared to *S. Infantis* infections without this plasmid.

498         The methods employed here cannot identify virulence changes due to sequence variations  
499 within virulence loci. Variants of the *macA* and *macB* genes in African strains of *S.*  
500 *Typhimurium* sequence-type 313 may have higher invasiveness in human patients and increased  
501 survival against challenge with antimicrobial peptides [58]. Others have identified virulence gene  
502 alleles that may correspond to pathogenicity differences [59]. The method employed identifies  
503 virulence genes against a non-redundant database using BLASTP, so alleles with variation less  
504 than 10% sequence identity will be collapsed into the same gene annotation. Furthermore, we did  
505 not consider pseudogene formation of virulence genes. Previous work suggests that pseudogenes  
506 in *S. enterica* genomes do not follow neutral evolution (random genetic drift, as in many  
507 Eukaryotes) but are readily lost from the chromosome [60]. However, pseudogene formation of  
508 the *sseI/srfH* secreted effector protein (higher carriage in cluster 1, Table 2) leads to  
509 hyperdissemination of ST313 *S. Typhimurium* in experimentally infected mice [61]. The role of



510 pseudogene formation and the pathogenesis needs more study, and the addition of pseudogene  
511 information could further improve virulence classifications. Additionally, we chose to focus our  
512 analysis on human, bovine, and beef isolates from the US. It is probable given the diversity of *S.*  
513 *enterica* that all virulence patterns and serovar subpopulations are not represented in this work.

514 *S. enterica* is a diverse pathogen. Yet, most risk assessments and food safety regulations  
515 informed by these assessments only separate Typhoidal Salmonellosis and non-Typhoidal  
516 Salmonellosis, treating serovars as a homogenous unit [62-64]. However, our results suggests  
517 that strains with the highest incidence of domestically acquired sporadic cases and outbreaks of  
518 human infections share a common virulence repertoire. Control and surveillance programs  
519 should devote resources to identifying and eliminating the major reservoirs of clinically relevant  
520 serovars. Furthermore, serovar virulence cannot be considered homogenous in all cases as  
521 observed with *S. Infantis* and *S. Typhimurium*. Although attributing virulence to specific genes  
522 was beyond the scope of this study, our analysis could inform further research to identify  
523 *Salmonella* genes associated with severe illness.

## 524 **Acknowledgements**

525 G.F, J.P., D.T., S.C., and F.J. are employed by EpiX Analytics. R.P. is a Senior Scientific  
526 Advisor for EpiX Analytics. This work utilized the Summit supercomputer, which is supported  
527 by the National Science Foundation (awards ACI-1532235 and ACI-1532236), the University of  
528 Colorado Boulder, and Colorado State University. The Summit supercomputer is a joint effort of  
529 the University of Colorado Boulder and Colorado State University. FoodNet Data: The findings  
530 and conclusions in this report are those of the author(s) and do not necessarily represent the  
531 official position of the Centers for Disease Control and Prevention.

## 532 **References**

- 533 1. Srikantiah P, Lay JC, Hand S, Crump JA, Campbell J, Van Duyne MS, et al. *Salmonella*  
534 *enterica* serotype Javiana infections associated with amphibian contact, Mississippi, 2001.  
535 *Epidemiol Infect.* 2004 Apr;132(2):273–81.
- 536 2. Lawson B, de Pinna E, Horton RA, Macgregor SK, John SK, Chantrey J, et al.  
537 Epidemiological Evidence That Garden Birds Are a Source of Human Salmonellosis in  
538 England and Wales. *PLOS ONE.* 2014 Feb 26;9(2):e88968.
- 539 3. *Salmonella* Subcommittee of the Nomenclature Committee of the International Society for  
540 Microbiology. The Genus *Salmonella* Lignières, 1900. *J Hyg (Lond).* 1934 Oct;34(3):333–  
541 50.
- 542 4. Grimont P, Weill FX. *Antigenic Formulae of the Salmonella serovars*, (9th ed.) Paris: WHO  
543 Collaborating Centre for Reference and Research on *Salmonella*. Inst Pasteur. 2007 Jan 1;1–  
544 166.
- 545 5. Centers for Disease Control and Prevention (CDC). *National Salmonella Surveillance*  
546 *Annual Report, 2016.* Atlanta, Georgia: US Department of Health and Human Services:  
547 CDC; 2018.
- 548 6. Worley J, Meng J, Allard MW, Brown EW, Timme RE. *Salmonella enterica* Phylogeny  
549 Based on Whole-Genome Sequencing Reveals Two New Clades and Novel Patterns of  
550 Horizontally Acquired Genetic Elements. *mBio.* 2018 Nov 27;9(6):e02303-18.
- 551 7. Rivera-Chávez F, Bäumlér AJ. The Pyromaniac Inside You: *Salmonella* Metabolism in the  
552 Host Gut. *Annu Rev Microbiol.* 2015 Oct 15;69(1):31–48.
- 553 8. Thiennimitr P, Winter SE, Winter MG, Xavier MN, Tolstikov V, Huseby DL, et al. Intestinal  
554 inflammation allows *Salmonella* to use ethanolamine to compete with the microbiota. *Proc*  
555 *Natl Acad Sci U S A.* 2011/10/03 ed. 2011 Oct 18;108(42):17480–5.
- 556 9. Drumo R, Pesciaroli M, Ruggeri J, Tarantino M, Chirullo B, Pistoia C, et al. *Salmonella*  
557 *enterica* Serovar Typhimurium Exploits Inflammation to Modify Swine Intestinal  
558 Microbiota. *Front Cell Infect Microbiol [Internet].* 2016;5. Available from:  
559 <https://www.frontiersin.org/article/10.3389/fcimb.2015.00106>
- 560 10. Marcus SL, Brumell JH, Pfeifer CG, Finlay BB. *Salmonella* pathogenicity islands: big  
561 virulence in small packages. *Microbes Infect.* 2000 Feb;2(2):145–56.
- 562 11. Lorkowski M, Felipe-López A, Danzer CA, Hansmeier N, Hensel M. *Salmonella enterica*  
563 invasion of polarized epithelial cells is a highly cooperative effort. *Infect Immun.* 2014/04/07  
564 ed. 2014 Jun;82(6):2657–67.
- 565 12. Steele-Mortimer O, Brumell JH, Knodler LA, Méresse S, Lopez A, Finlay BB. The invasion-  
566 associated type III secretion system of *Salmonella enterica* serovar Typhimurium is

- 567 necessary for intracellular proliferation and vacuole biogenesis in epithelial cells. *Cell*  
568 *Microbiol.* 2002 Jan 1;4(1):43–54.
- 569 13. Kurtz JR, Goggins JA, McLachlan JB. Salmonella infection: Interplay between the bacteria  
570 and host immune system. *Immunol Lett.* 2017/07/15 ed. 2017 Oct;190:42–50.
- 571 14. Gal-Mor O, Boyle EC, Grassl GA. Same species, different diseases: how and why typhoidal  
572 and non-typhoidal *Salmonella enterica* serovars differ. *Front Microbiol* [Internet]. 2014;5.  
573 Available from: <https://www.frontiersin.org/article/10.3389/fmicb.2014.00391>
- 574 15. Harvey RR, Friedman CR, Crim SM, Judd M, Barrett KA, Tolar B, et al. Epidemiology of  
575 *Salmonella enterica* Serotype Dublin Infections among Humans, United States, 1968-2013.  
576 *Emerg Infect Dis.* 2017 Sep;23(9):1493–501.
- 577 16. Ramachandran G, Panda A, Higginson EE, Ateh E, Lipsky MM, Sen S, et al. Virulence of  
578 invasive *Salmonella Typhimurium* ST313 in animal models of infection. *PLoS Negl Trop*  
579 *Dis.* 2017 Aug 4;11(8):e0005697.
- 580 17. Jiang L, Wang P, Song X, Zhang H, Ma S, Wang J, et al. *Salmonella Typhimurium*  
581 reprograms macrophage metabolism via T3SS effector SopE2 to promote intracellular  
582 replication and virulence. *Nat Commun.* 2021 Feb 9;12(1):879.
- 583 18. Cheng RA, Eade CR, Wiedmann M. Embracing Diversity: Differences in Virulence  
584 Mechanisms, Disease Severity, and Host Adaptations Contribute to the Success of  
585 Nontyphoidal *Salmonella* as a Foodborne Pathogen. *Front Microbiol* [Internet]. 2019;10.  
586 Available from: <https://www.frontiersin.org/article/10.3389/fmicb.2019.01368>
- 587 19. Faber F, Thiennimitr P, Spiga L, Byndloss MX, Litvak Y, Lawhon S, et al. Respiration of  
588 Microbiota-Derived 1,2-propanediol Drives *Salmonella* Expansion during Colitis. *PLOS*  
589 *Pathog.* 2017 Jan 5;13(1):e1006129.
- 590 20. Hannemann S, Galán JE. *Salmonella enterica* serovar-specific transcriptional reprogramming  
591 of infected cells. *PLOS Pathog.* 2017 Jul 24;13(7):e1006532.
- 592 21. Pulford CV, Perez-Sepulveda BM, Canals R, Bevington JA, Bengtsson RJ, Wenner N, et al.  
593 Stepwise evolution of *Salmonella Typhimurium* ST313 causing bloodstream infection in  
594 Africa. *Nat Microbiol.* 2021 Mar 1;6(3):327–38.
- 595 22. Ebel ED, Williams MS, Schlosser WD. Estimating the Type II error of detecting changes in  
596 foodborne illnesses via public health surveillance. *Microb Risk Anal.* 2017 Dec 1;7:1–7.
- 597 23. Karanth S, Tanui CK, Meng J, Pradhan AK. Exploring the predictive capability of advanced  
598 machine learning in identifying severe disease phenotype in *Salmonella enterica*. *Food Res*  
599 *Int.* 2022 Jan 1;151:110817.
- 600 24. Chen R, Cheng RA, Wiedmann M, Orsi RH. Development of a Genomics-Based Approach  
601 To Identify Putative Hypervirulent Nontyphoidal *Salmonella* Isolates: *Salmonella enterica*  
602 Serovar Saintpaul as a Model. *mSphere.* 2022 Feb 23;7(1):e0073021.

- 603 25. National Advisory Committee on Microbiological Criteria for Foods (NACMCF). Response  
604 to Questions Posed by the Food Safety and Inspection Service: Enhancing Salmonella  
605 Control in Poultry Products. 2022. Available from:  
606 [https://www.fsis.usda.gov/sites/default/files/media\\_file/documents/NACMCF\\_Salmonella-](https://www.fsis.usda.gov/sites/default/files/media_file/documents/NACMCF_Salmonella-Poultry_Response_for_Committee_Review.pdf)  
607 [Poultry\\_Response\\_for\\_Committee\\_Review.pdf](https://www.fsis.usda.gov/sites/default/files/media_file/documents/NACMCF_Salmonella-Poultry_Response_for_Committee_Review.pdf)
- 608 26. Ward C. Vertical Integration Comparison: Beef, Pork, and Poultry. Western Agricultural  
609 Economics Association; 1997. Available from:  
610 <https://EconPapers.repec.org/RePEc:ags:waeare:35759>
- 611 27. Palma F, Manfreda G, Silva M, Parisi A, Barker DOR, Taboada EN, et al. Genome-wide  
612 identification of geographical segregated genetic markers in *Salmonella enterica* serovar  
613 Typhimurium variant 4,[5],12:i:-. *Sci Rep*. 2018 Oct 15;8(1):15251.
- 614 28. Fenske GJ, Thachil A, McDonough PL, Glaser A, Scaria J. Geography Shapes the  
615 Population Genomics of *Salmonella enterica* Dublin. *Genome Biol Evol*. 2019 Aug  
616 1;11(8):2220–31.
- 617 29. CDC. Foodborne Diseases Active Surveillance Network. Atlanta, Georgia: US Department  
618 of Health and Human Services: CDC;
- 619 30. Yoshida CE, Kruczkiewicz P, Laing CR, Lingohr EJ, Gannon VPJ, Nash JHE, et al. The  
620 *Salmonella* In Silico Typing Resource (SISTR): An Open Web-Accessible Tool for Rapidly  
621 Typing and Subtyping Draft *Salmonella* Genome Assemblies. *PLOS ONE*. 2016 Jan  
622 22;11(1):e0147101.
- 623 31. Liu B, Zheng D, Jin Q, Chen L, Yang J. VFDB 2019: a comparative pathogenomic platform  
624 with an interactive web interface. *Nucleic Acids Res*. 2019 Jan 8;47(D1):D687–92.
- 625 32. Mao C, Abraham D, Wattam AR, Wilson MJC, Shukla M, Yoo HS, et al. Curation,  
626 integration and visualization of bacterial virulence factors in PATRIC. *Bioinformatics*. 2015  
627 Jan 15;31(2):252–8.
- 628 33. Fu L, Niu B, Zhu Z, Wu S, Li W. CD-HIT: accelerated for clustering the next-generation  
629 sequencing data. *Bioinformatics*. 2012/10/11 ed. 2012 Dec 1;28(23):3150–2.
- 630 34. Seemann T. Prokka: rapid prokaryotic genome annotation. *Bioinformatics*. 2014 Jul  
631 15;30(14):2068–9.
- 632 35. Hyatt D, Chen GL, LoCascio PF, Land ML, Larimer FW, Hauser LJ. Prodigal: prokaryotic  
633 gene recognition and translation initiation site identification. *BMC Bioinformatics*. 2010 Mar  
634 8;11(1):119.
- 635 36. McMillan EA, Wasilenko JL, Tagg KA, Chen JC, Simmons M, Gupta SK, et al. Carriage  
636 and Gene Content Variability of the pESI-Like Plasmid Associated with *Salmonella* *Infantis*  
637 Recently Established in United States Poultry Production. *Genes*. 2020 Dec 18;11(12):1516.

- 638 37. Franco A, Leekitcharoenphon P, Feltrin F, Alba P, Cordaro G, Iurescia M, et al. Emergence  
639 of a Clonal Lineage of Multidrug-Resistant ESBL-Producing *Salmonella* *Infantis*  
640 Transmitted from Broilers and Broiler Meat to Humans in Italy between 2011 and 2014.  
641 PLoS ONE. 2015 Dec 30;10(12):e0144802.
- 642 38. Seemann T. ABRicate. 2022. [cited 2 December 2022]. Database: github [Internet].  
643 Available from: <https://github.com/tseemann/abricate>
- 644 39. Liaw A, Wiener M. Classification and Regression by randomForest. R News. 2002;2(3):18–  
645 22.
- 646 40. R Core Team. R: A Language and Environment for Statistical Computing [Internet]. Vienna,  
647 Austria: R Foundation for Statistical Computing; 2021. Available from: [https://www.R-](https://www.R-project.org/)  
648 [project.org/](https://www.R-project.org/)
- 649 41. Ward JH. Hierarchical Grouping to Optimize an Objective Function. J Am Stat Assoc.  
650 1963;58(301):236–44.
- 651 42. Hennig C. Cluster-wise assessment of cluster stability. Comput Stat Data Anal. 2007 Sep  
652 15;52(1):258–71.
- 653 43. Hennig C. fpc: Flexible Procedures for Clustering. 2020. Available from: [https://CRAN.R-](https://CRAN.R-project.org/package=fpc)  
654 [project.org/package=fpc](https://CRAN.R-project.org/package=fpc)
- 655 44. Gelman A, Carlin JB, Stern HS, Dunson DB, Vehtari A, Rubin DB. Bayesian Data Analysis.  
656 3<sup>rd</sup> ed. Boca Raton: CRC Press; 2013.
- 657 45. Lerminiaux NA, MacKenzie KD, Cameron ADS. *Salmonella* Pathogenicity Island 1 (SPI-1):  
658 The Evolution and Stabilization of a Core Genomic Type Three Secretion System.  
659 Microorganisms. 2020 Apr 16;8(4):576.
- 660 46. Brown EW, Bell R, Zhang G, Timme R, Zheng J, Hammack TS, et al. *Salmonella* Genomics  
661 in Public Health and Food Safety. EcoSal Plus. 2021 Dec 15;9(2):eESP00082020.
- 662 47. Pornsukarom S, van Vliet AHM, Thakur S. Whole genome sequencing analysis of multiple  
663 *Salmonella* serovars provides insights into phylogenetic relatedness, antimicrobial resistance,  
664 and virulence markers across humans, food animals and agriculture environmental sources.  
665 BMC Genomics. 2018 Nov 6;19(1):801.
- 666 48. Petrovska L, Mather AE, AbuOun M, Branchu P, Harris SR, Connor T, et al. Microevolution  
667 of Monophasic *Salmonella* Typhimurium during Epidemic, United Kingdom, 2005-2010.  
668 Emerg Infect Dis. 2016 Apr;22(4):617–24.
- 669 49. Bäumlér AJ, Tsoilis RM, Heffron F. The *lpf* fimbrial operon mediates adhesion of *Salmonella*  
670 typhimurium to murine Peyer's patches. Proc Natl Acad Sci U S A. 1996 Jan 9;93(1):279–  
671 83.

- 672 50. Gonzales AM, Wilde S, Roland KL. New Insights into the Roles of Long Polar Fimbriae and  
673 Stg Fimbriae in Salmonella Interactions with Enterocytes and M Cells. *Infect Immun*. 2017  
674 Aug 18;85(9):e00172-17.
- 675 51. Park D, Lara-Tejero M, Waxham MN, Li W, Hu B, Galán JE, et al. Visualization of the type  
676 III secretion mediated Salmonella-host cell interface using cryo-electron tomography. *eLife*.  
677 2018 Oct 3;7.
- 678 52. Torres AG, Kanack KJ, Tutt CB, Popov V, Kaper JB. Characterization of the second long  
679 polar (LP) fimbriae of *Escherichia coli* O157:H7 and distribution of LP fimbriae in other  
680 pathogenic *E. coli* strains. *FEMS Microbiol Lett*. 2004 Sep 1;238(2):333–44.
- 681 53. Jordan DM, Cornick N, Torres AG, Dean-Nystrom EA, Kaper JB, Moon HW. Long polar  
682 fimbriae contribute to colonization by *Escherichia coli* O157:H7 in vivo. *Infect Immun*. 2004  
683 Oct;72(10):6168–71.
- 684 54. Gao R, Huang H, Hamel J, Levesque RC, Goodridge LD, Ogunremi D. Application of a  
685 High-Throughput Targeted Sequence AmpliSeq Procedure to Assess the Presence and  
686 Variants of Virulence Genes in Salmonella. *Microorganisms*. 2022 Feb 5;10(2).
- 687 55. Aviv G, Tsyba K, Steck N, Salmon-Divon M, Cornelius A, Rahav G, et al. A unique  
688 megaplasmid contributes to stress tolerance and pathogenicity of an emergent *Salmonella*  
689 enterica serovar Infantis strain. *Environ Microbiol*. 2014 Apr 1;16(4):977–94.
- 690 56. Nairz M, Ferring-Appel D, Casarrubea D, Sonnweber T, Viatte L, Schroll A, et al. Iron  
691 Regulatory Proteins Mediate Host Resistance to Salmonella Infection. *Cell Host Microbe*.  
692 2015 Aug 12;18(2):254–61.
- 693 57. van Santen S, de Mast Q, Swinkels DW, van der Ven AJAM. The iron link between malaria  
694 and invasive non-typhoid *Salmonella* infections. *Trends Parasitol*. 2013 May;29(5):220–7.
- 695 58. Honeycutt JD, Wenner N, Li Y, Brewer SM, Massis LM, Brubaker SW, et al. Genetic  
696 variation in the MacAB-TolC efflux pump influences pathogenesis of invasive *Salmonella*  
697 isolates from Africa. *PLOS Pathog*. 2020 Aug 24;16(8):e1008763.
- 698 59. Rakov AV, Mastriani E, Liu SL, Schifferli DM. Association of *Salmonella* virulence factor  
699 alleles with intestinal and invasive serovars. *BMC Genomics*. 2019 May 28;20(1):429.
- 700 60. Kuo CH, Ochman H. The Extinction Dynamics of Bacterial Pseudogenes. *PLOS Genet*.  
701 2010 Aug 5;6(8):e1001050.
- 702 61. Carden SE, Walker GT, Honeycutt J, Lugo K, Pham T, Jacobson A, et al. Pseudogenization  
703 of the Secreted Effector Gene *sseI* Confers Rapid Systemic Dissemination of *S.*  
704 *Typhimurium* ST313 within Migratory Dendritic Cells. *Cell Host Microbe*. 2017 Feb  
705 8;21(2):182–94.



706 62. Food Safety Inspection Service (FSIS). Public Health Effects of Performance Standards for  
707 Ground Beef and Beef Manufacturing Trimmings. Washington D.C.: US Department of  
708 Agriculture: FSIS; 2019.

709 63. Food Safety Inspection Service (FSIS). Public Health Effects of Raw Chicken Parts and  
710 Comminuted Chicken and Turkey Performance Standards. Washington D.C.: US  
711 Department of Agriculture: FSIS; 2015.

712 64. Lambertini E, Ruzante JM, Kowalczyk, BB. The Public Health Impact of Implementing a  
713 Concentration-Based Microbiological Criterion for Controlling Salmonella in Ground  
714 Turkey. Risk Analysis. 2021 Aug; 41(8):1376-95.

715

## 716 **Supporting information**

717 **S1 Fig. Addition of a sixth virulence cluster.** (A) Dendrogram depicting the hierarchical  
718 relationship between 12,337 *S. enterica* genome assemblies based upon virulence gene carriage  
719 with six virulence clusters superimposed on top. (B) Heatmap of serovar proportion within each  
720 of the six respective virulence clusters. Rows are clustered using Ward's method. (C)  
721 Characteristics of the six virulence clusters: cluster stability - Jaccard similarity of 10,000 non-  
722 parametric bootstraps, Number of Genomes - depicting the number of *S. enterica* genomes  
723 constituent in each cluster, and number of serovars (within cluster serovar proportion > 0.5) in  
724 each cluster.

725

726 **S1 Table. Output of SISTR serovar prediction.** Full results of the in silico serovar prediction  
727 for the analysis set genomes from the SISTR software.

728

729 **S2 Table. Metadata for the analysis set of genomes.** Detailed metadata for the contig  
730 assemblies used in the analysis including BioSample, BioProject, and SRA accession numbers.

731

732 **S3 Table. Isolate virulence cluster designations.** Virulence cluster designations ( $k = 5$ ) for the  
733 12,337 contig assemblies in the analysis set including putative serovar designation.

734

735 **S4 Table. Epidemiological indicators computed for each virulence cluster.** Estimates of:  
736 incidence of domestically acquired sporadic cases per 100k people per year, hospitalization  
737 proportion given infection, proportion positive in FSIS testing of US beef products (MT43,  
738 MT60, MT64), extraintestinal proportion given infection, and mortality proportion given  
739 infection.

740

741 **S5 Table. Epidemiological indicators computed for each serovar.** Estimates of: incidence of  
742 domestically acquired sporadic cases per 100k people per year, hospitalization proportion given  
743 infection, proportion positive in FSIS testing of US beef products, extraintestinal proportion  
744 given infection, and mortality proportion given infection.

745

746 **S6 Table. Differential putative virulence loci between cluster 1 and clusters 2-5.** Relative  
747 frequency, mean decrease of Gini impurity, and basic gene metadata for virulence factors tested  
748 between cluster 1 and clusters 2-5 combined.

749

750 **S7 Table. Isolate virulence subpopulation cluster designations.** Subpopulation cluster  
751 designations ( $k = 37$ ) for the 12,337 contig assemblies in the analysis set.

752

753

754



## Bovine and Beef *S. enterica* Isolates

## Human *S. enterica* Isolates

Isolates from beef (FSIS HACCP sampling and FDA NARMS), and bovine isolates (FSIS NARMS)

n = 38,795

**Ineligible:** n = 32,285  
Isolation sources not from bovine animals nor beef.

Bovine or beef associated isolates

n = 6,510

Human associated isolates from FoodNet & NORS surveillance

n = 15,054

Human associated isolates from US sporadic cases and beef-associated outbreaks.

n = 7,793

**Ineligible:** n = 7,261

1. FoodNet:

A. International travel (n = 974)

B. Immigration related (n = 11)

C. Outbreak origin (n = 905)

2. NORS: Attribution to source other than beef (n = 4,847)

## Analysis Set

Combined set of isolates

n = 14,303

**Ineligible:** n = 494

1. No assembly (276)
2. Assembler not SKESA v. 2.2 (n = 149)
3. Contig n > 300 (n = 69)
4. Contig n50 < 2.5E4 bp (n = 0)

Isolates passing initial assembly QC

n = 13,809

**Ineligible:** n = 162

Assembly fails QC step in serovar prediction.

Isolate assemblies with predicted serovar

n = 13,647

**Ineligible:** n = 1,310

Isolate serovar contains less than 50 isolates

Final Isolate Assembly Set

Bovine or Beef Associated : n = 5,586  
Human Associated: n = 6,751

Total: n = 12,337

*Acquire and Quality Control Genome Assemblies*

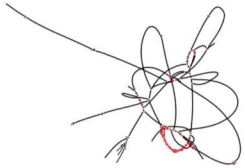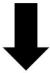

*Identify Virulence Genes*

|           |                          |
|-----------|--------------------------|
| Isolate A | 111111000100111200101111 |
| Isolate B | 111100011101000211110001 |
| Isolate C | 011100011120001111111101 |
| Isolate D | 111111000100111200100000 |
| Isolate E | 111010000101111200101101 |
| Isolate F | 111111000100111200100111 |
| Isolate G | 111100011101000211110001 |
| Isolate H | 111100011101000211111112 |

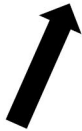

*Compute Isolate Relatedness  
(Unsupervised Random Forest)*

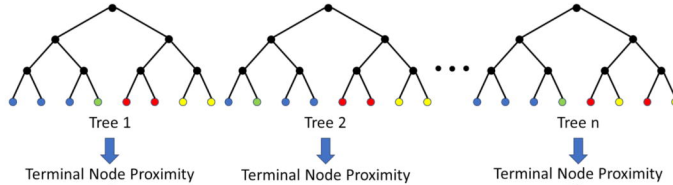

*Isolate Cluster Generation*

*(Hierarchical clustering and non-parametric bootstrapping)*

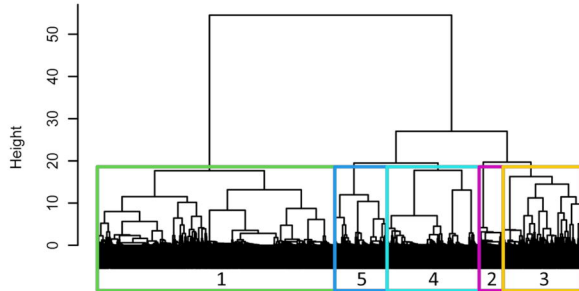

*Serovar Virulence Clusters*

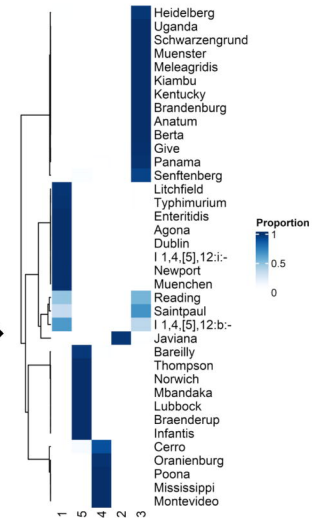

A

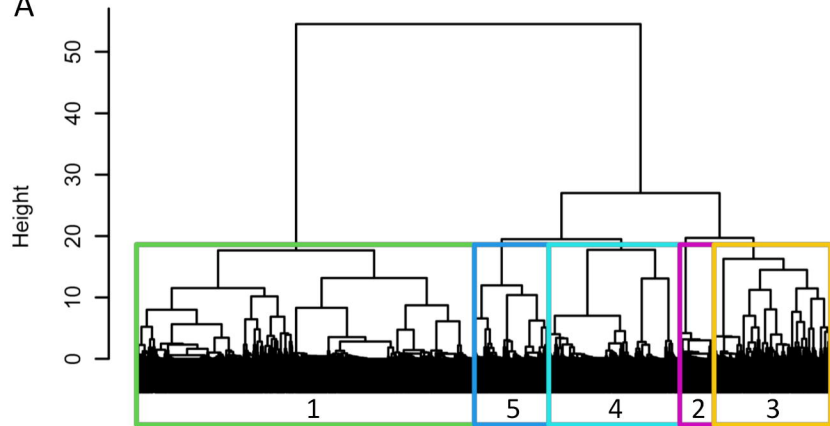

C

| Cluster | Cluster Stability (Jaccard Similarity) | Number of Genomes | Serovar Count (prop > 0.50) |
|---------|----------------------------------------|-------------------|-----------------------------|
| 1       | 0.960                                  | 6006              | 9                           |
| 2       | 0.887                                  | 608               | 1                           |
| 3       | 0.838                                  | 2073              | 15                          |
| 4       | 0.995                                  | 2329              | 5                           |
| 5       | 0.987                                  | 1321              | 7                           |

B

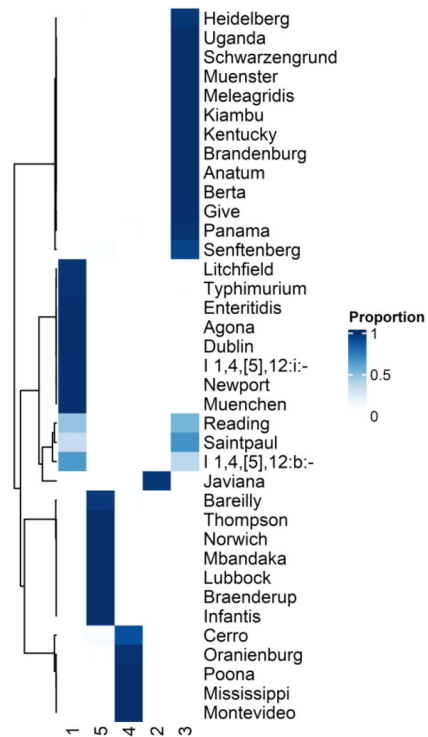

**Average Annual Incidence Rate: 2016 - 2019**  
(Sporadic and Domestically Acquired Cases)

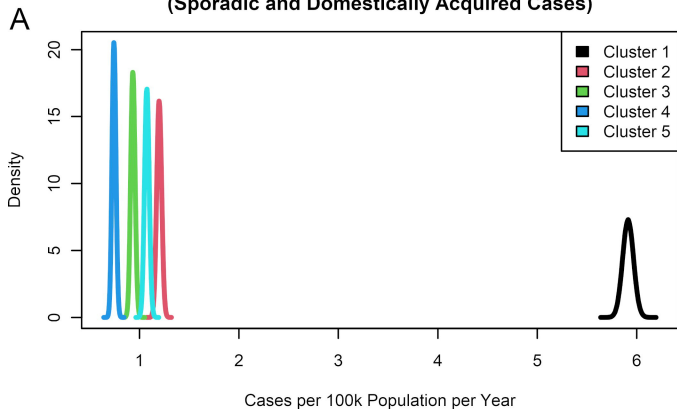

**Hospitalization Proportion: 2016 - 2019**  
(Sporadic and Domestically Acquired Cases)

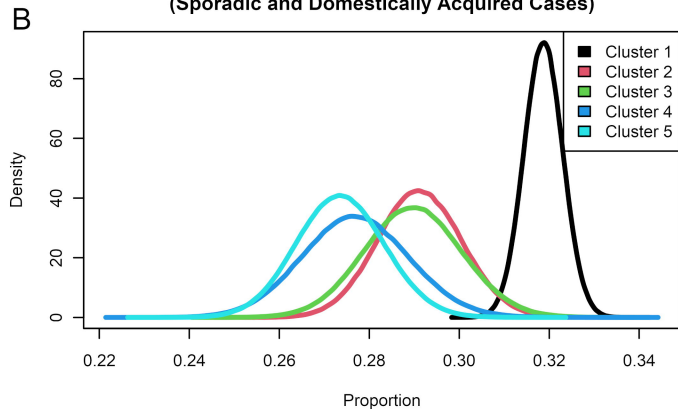

**Proportion Positive in FSIS Beef Sampling: 2016-2019**

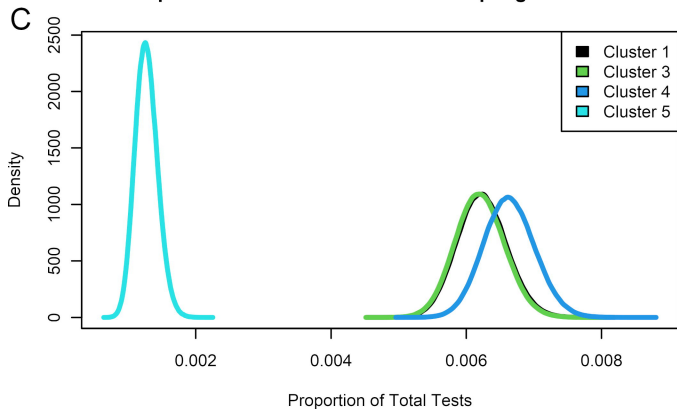

**Proportion of Outbreaks: 2016 - 2019**

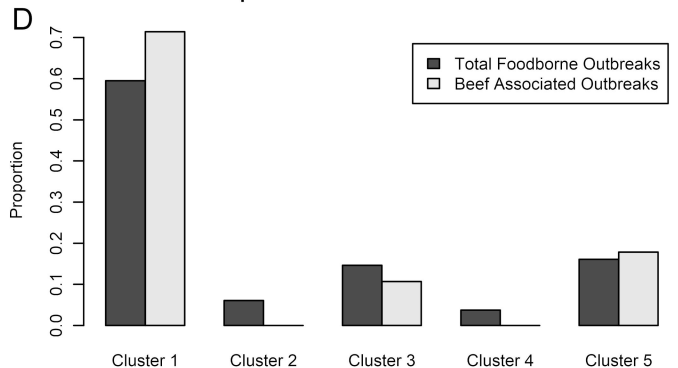

# S. Infantis

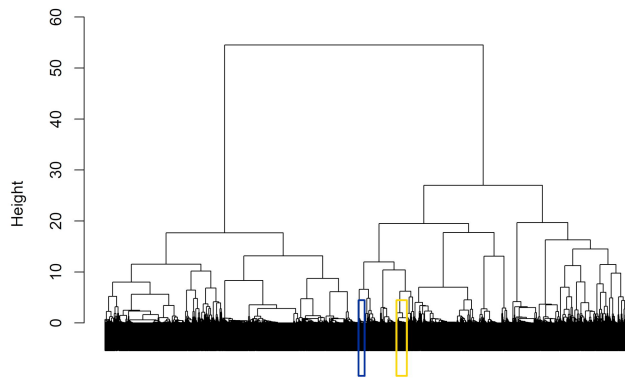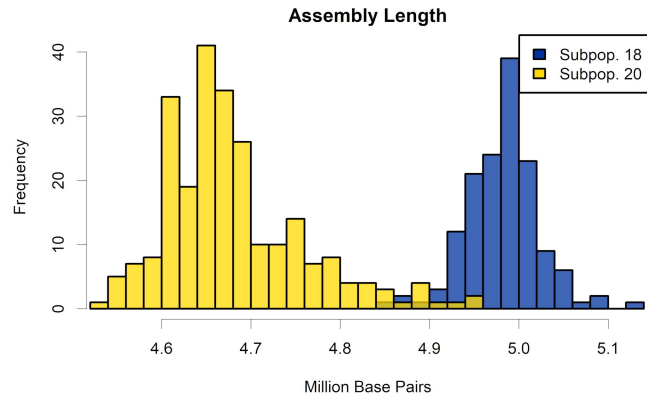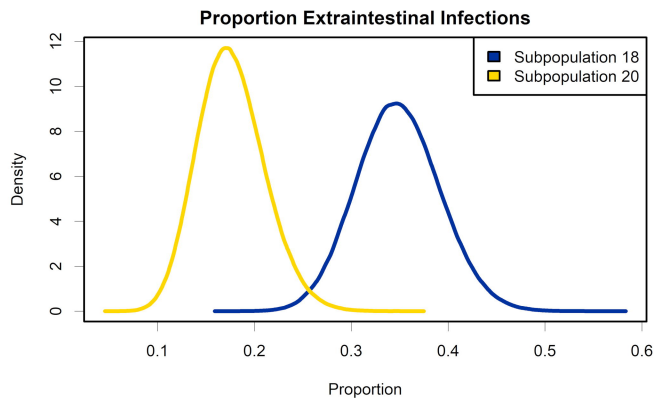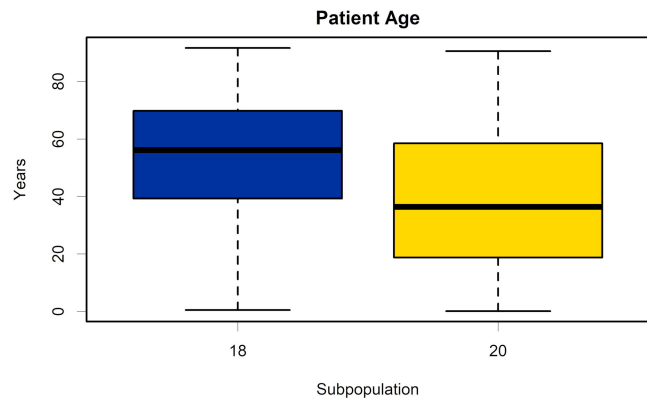

# S. Typhimurium

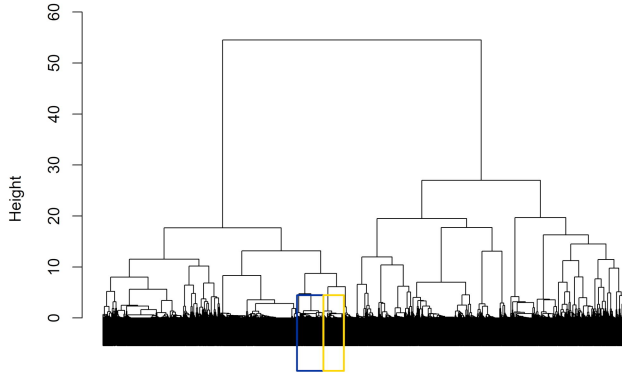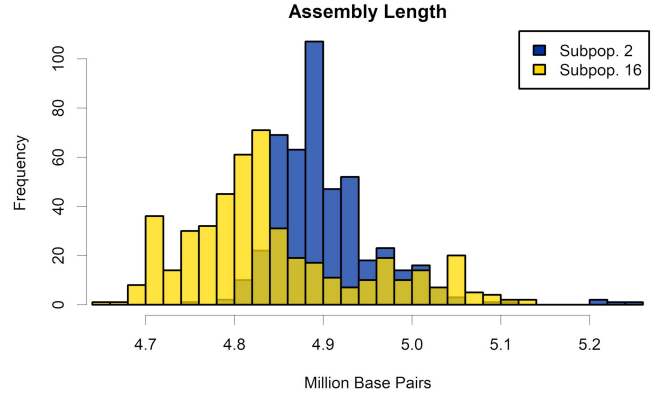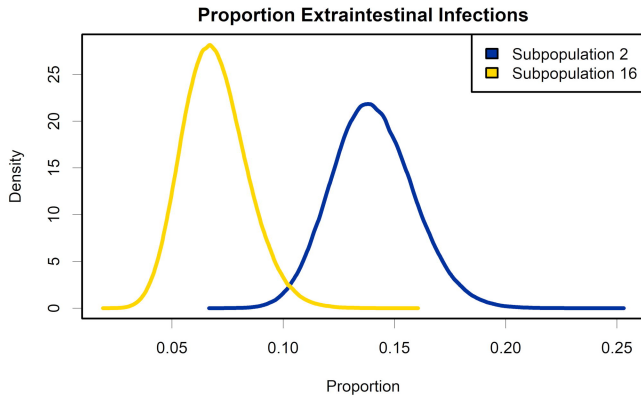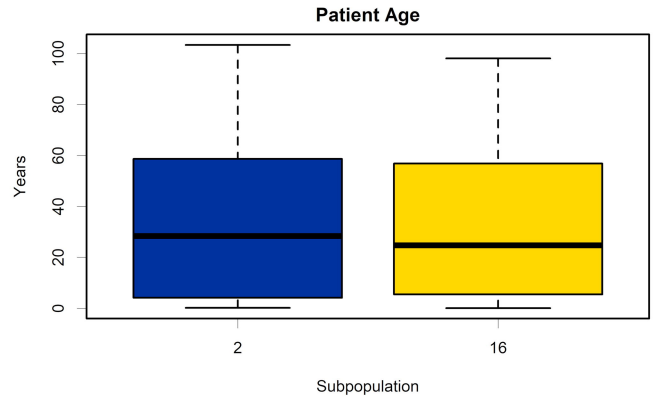

Source: https://medrxiv.org/content/10.1101/2022.12.13.22283417v1.full.pdf
